# Supplementary material for: Highly-efficient growth of cobalt nanostructures using focused ion beam induced deposition under cryogenic conditions: application to electrical contacts on graphene, magnetism and hard masking
Source: Royal Society of Chemistry journal article supplement (doi:10.1039/d1na00580d), 2021-01-01
Supplement: d1na00580d1.pdf [file d1na00580d1.pdf]

Supporting Information for

**Highly-efficient growth of cobalt nanostructures using focused ion beam induced deposition under cryogenic conditions: application to electrical contacts on graphene, magnetism and hard masking**

Alba Salvador-Porroche,<sup>a</sup> Soraya Sangiao,<sup>a,b</sup> César Magén,<sup>a,b</sup> Mariano Barrado,<sup>b</sup> Patrick Philipp,<sup>c</sup>  
Daria Belotcerkovtceva,<sup>d</sup> Venkata Kamalakar,<sup>d</sup> Pilar Cea,<sup>a,b</sup> José M. De Teresa,<sup>\*a,b</sup>

<sup>a</sup> Instituto de Nanociencia y Materiales de Aragón (INMA), CSIC-Universidad de Zaragoza, 50009 Zaragoza, Spain. E-mail: deteresa@unizar.es; j.deteresa@csic.es

<sup>b</sup> Laboratorio de Microscopías Avanzadas (LMA), Universidad de Zaragoza, 50018 Zaragoza, Spain.

<sup>c</sup> Advanced Instrumentation for Nano-Analytics (AINA), MRT Department, Luxembourg Institute of Science and Technology (LIST), 41 rue du Brill, 4422 Belvaux, Luxembourg.

<sup>d</sup> Department of Physics and Astronomy, Uppsala University, Box 516, SE-751 20 Uppsala, Sweden.

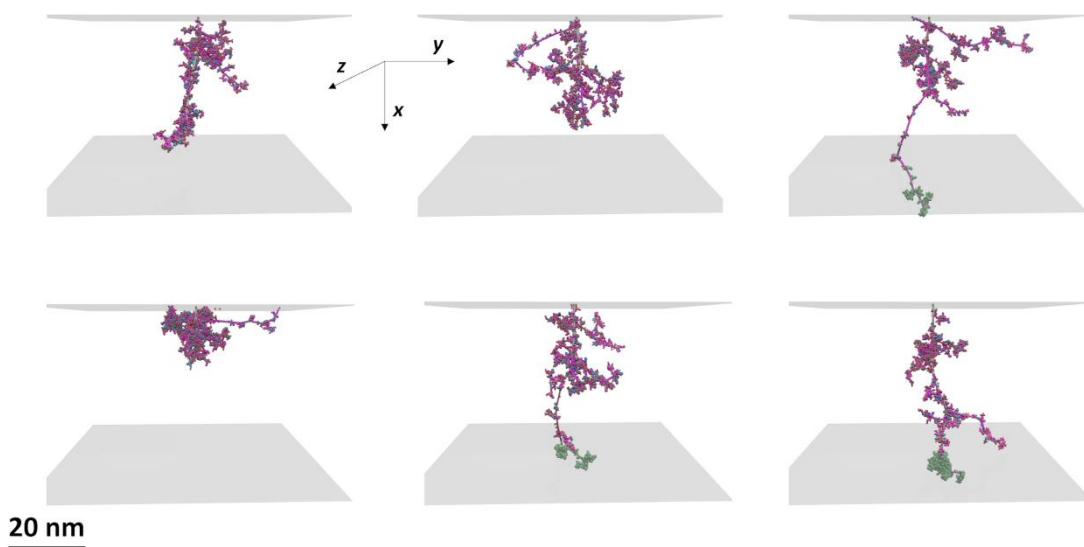

**Fig. S1:** Six different scenarios of collision cascades obtained by SDTRIMSP for 30 keV  $\text{Ga}^+$  irradiation on a 44 nm-thick  $\text{Co}_2(\text{CO})_8$  condensed layer on top of a Si substrate. Colors of the species: Ga in grey, Si in green, Co in blue, C in magenta, O in red.

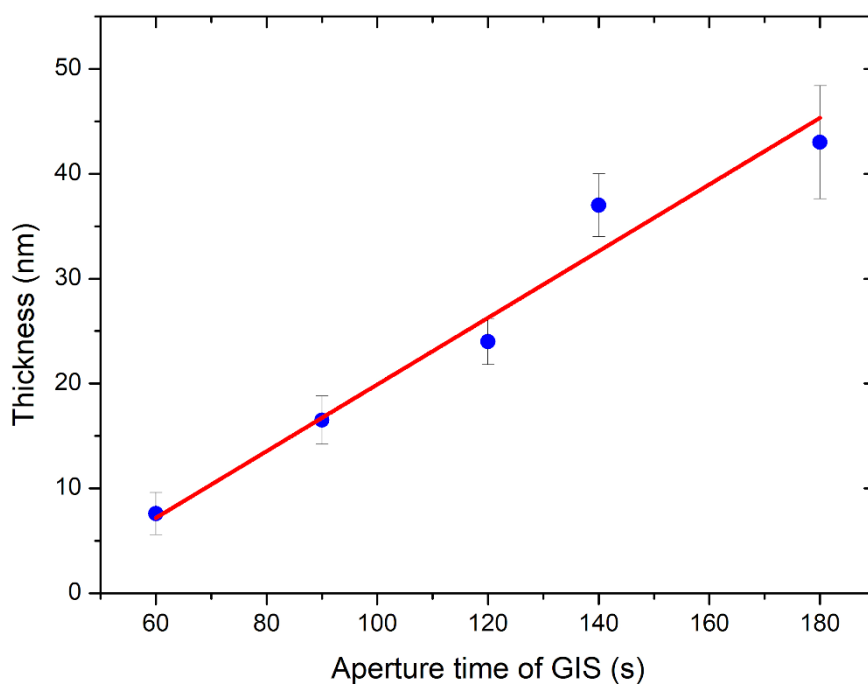

**Fig. S2:** Linear dependence between the thickness of the deposits after irradiation and the aperture time of the gas injector system (GIS).

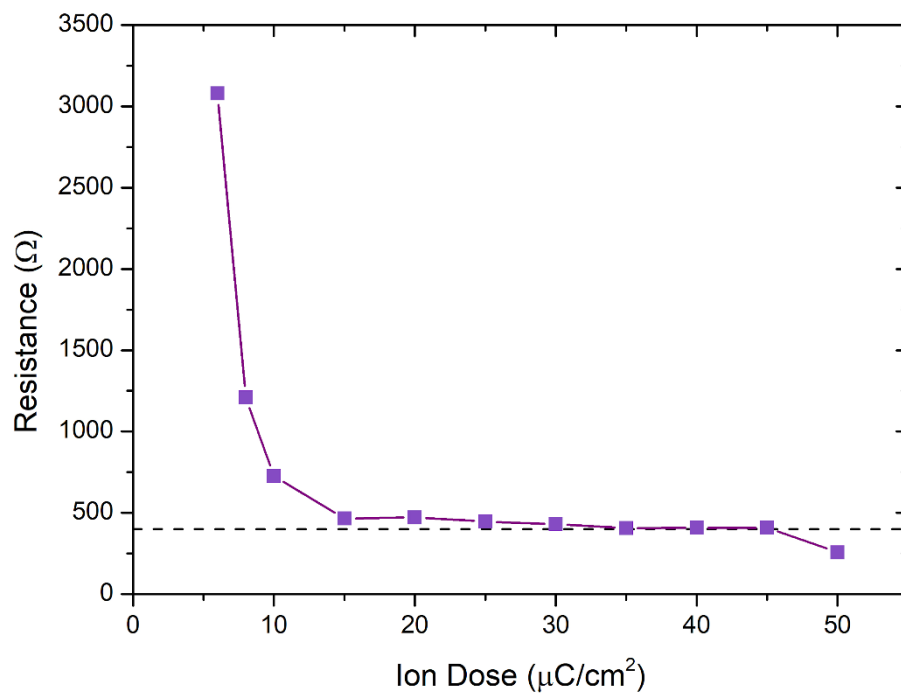

**Fig. S3:** Electrical resistance of cobalt deposits as a function of the ion dose for their fabrication by Cryo-FIBID technique. The lower resistance of the deposit grown with  $50 \mu\text{C}/\text{cm}^2$  is due to the smaller distance between the voltage contacts.

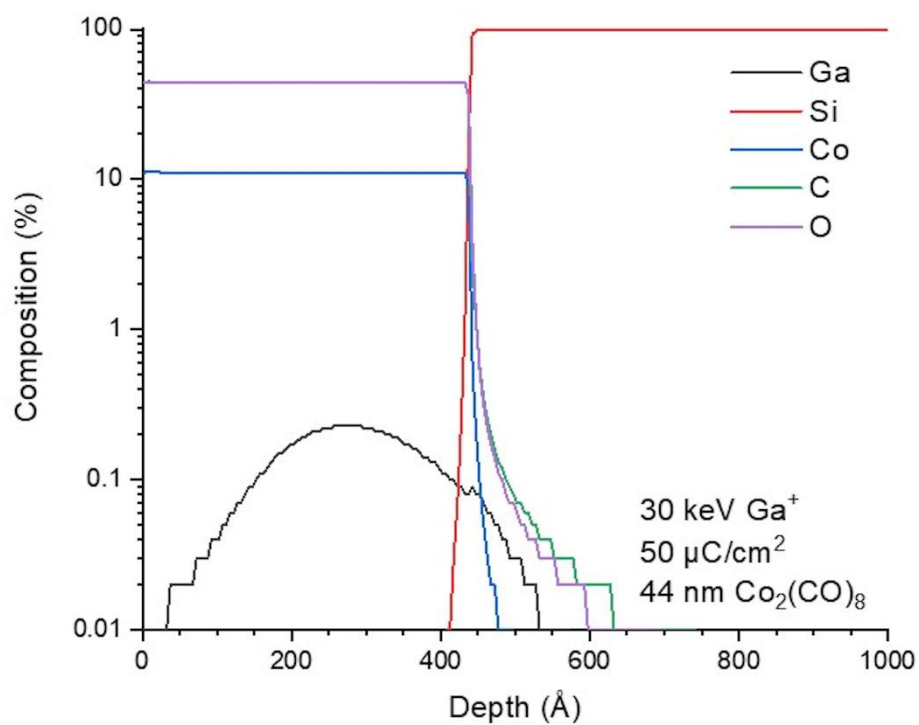

**Fig. S4:** Atomic composition of the  $\text{Co}_2(\text{CO})_8$  precursor layer versus depth obtained by SDTrimSP simulations for irradiation of  $30 \text{ keV } \text{Ga}^+$  with an ion dose of  $50 \mu\text{C}/\text{cm}^2$ . The emission of volatile species as  $\text{CO}_x$  is underestimated in these simulations.

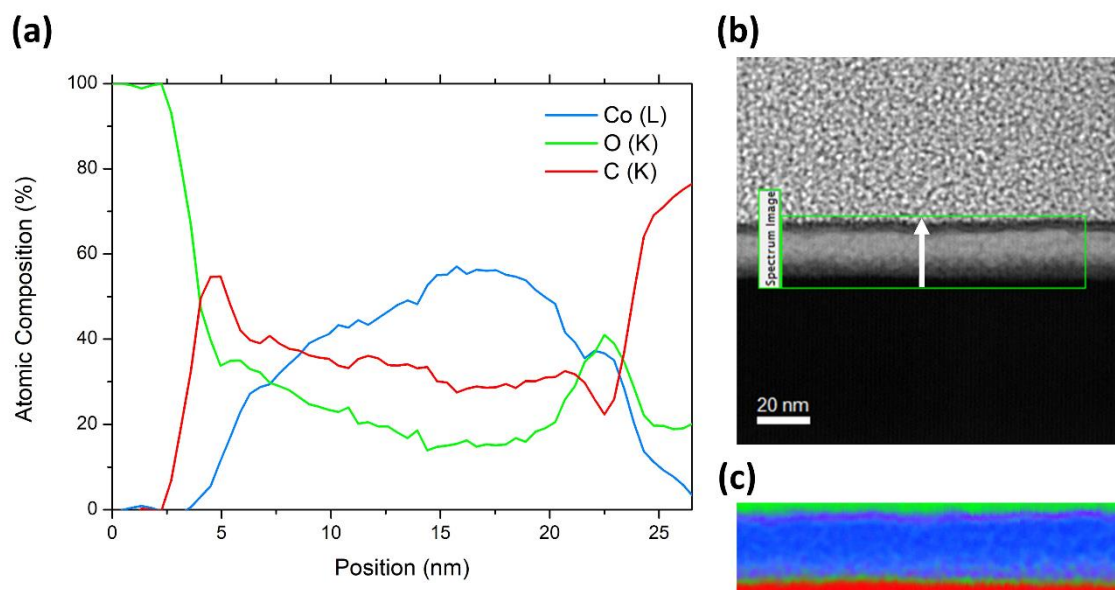

**Fig. S5:** (a) STEM-EELS chemical analysis along the cross-section of the 20 nm-thick deposit grown with an ion dose of  $15 \mu\text{C}/\text{cm}^2$ . This profile is shown in the HAADF-STEM image in (b). (c) EELS chemical map of the elements that are present in our sample: carbon in red, oxygen in green and cobalt in blue.

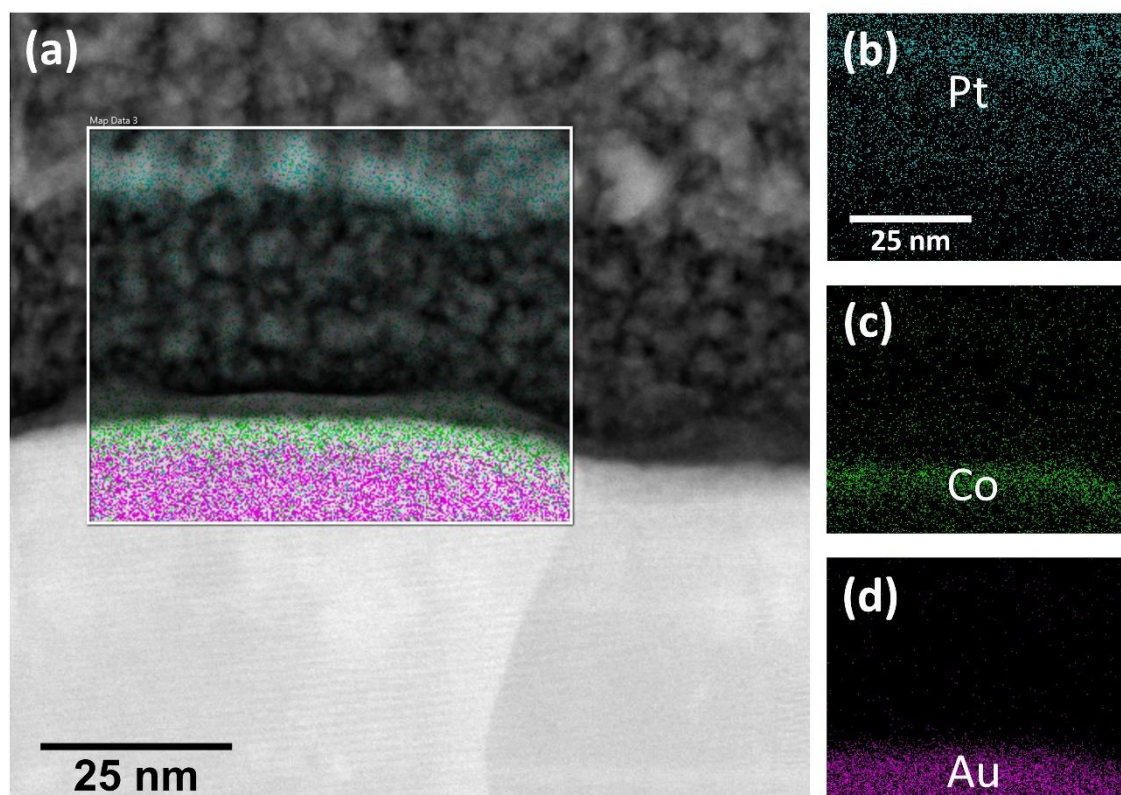

**Fig. S6:** STEM-EDS analysis in the cross-section of protected gold with Co Cryo-FIBID deposit. (a) Two dimensional EDS real density chemical map of the significant elements (b) Pt, (c) Co, and (d) Au.
